# Supplementary material for: Development of Nervilia fordii Extract-Loaded Electrospun PVA/PVP Nanocomposite for Antioxidant Packaging
Source: MDPI journal article supplement (doi:10.3390/foods10081728), 2021-07-27
Supplement: s1 [file s1]

## Supporting information

**Table S1.** Factors and levels in BBD

| Factors                   | Symbols | levels |      |      |
|---------------------------|---------|--------|------|------|
|                           |         | -1     | 0    | 1    |
| Ethanol concentration (%) | A       | 55     | 60   | 65   |
| Temperature (°C)          | B       | 65     | 70   | 75   |
| Solid-liquid rate         | C       | 5:1    | 10:1 | 15:1 |

**Table S2.** Analysis of variance (ANOVA) for the experimental results of BBD

| Source                  | Sum of Squares | df                          | Variance | F-Value | <i>p</i> -Value | Significance    |
|-------------------------|----------------|-----------------------------|----------|---------|-----------------|-----------------|
| Model                   | 55.78          | 9                           | 6.20     | 244.4   | <0.0001         | Significant     |
| A                       | 4.48           | 1                           | 4.48     | 176.56  | <0.0001         |                 |
| B                       | 18.61          | 1                           | 18.61    | 733.87  | <0.0001         |                 |
| C                       | 22.80          | 1                           | 22.8     | 898.98  | <0.0001         |                 |
| AB                      | 0.25           | 1                           | 0.25     | 9.78    | 0.0167          |                 |
| AC                      | 0.3            | 1                           | 0.3      | 11.99   | 0.0105          |                 |
| BC                      | 0.39           | 1                           | 0.39     | 15.26   | 0.0059          |                 |
| A <sup>2</sup>          | 0.78           | 1                           | 0.78     | 30.72   | 0.0009          |                 |
| B <sup>2</sup>          | 2.8            | 1                           | 2.8      | 110.25  | <0.0001         |                 |
| C <sup>2</sup>          | 4.56           | 1                           | 4.56     | 179.79  | <0.0001         |                 |
| Residual                | 0.18           | 7                           | 0.025    |         |                 | Not significant |
| Lack of fit             | 0.13           | 3                           | 0.043    | 3.46    | 0.1309          |                 |
| Pure error              | 0.049          | 4                           | 0.012    |         |                 |                 |
| Total                   | 55.96          | 16                          |          |         |                 |                 |
| deviation               |                |                             |          |         |                 |                 |
| R <sup>2</sup> = 0.9968 |                | R <sup>2</sup> adj = 0.9927 |          |         |                 |                 |

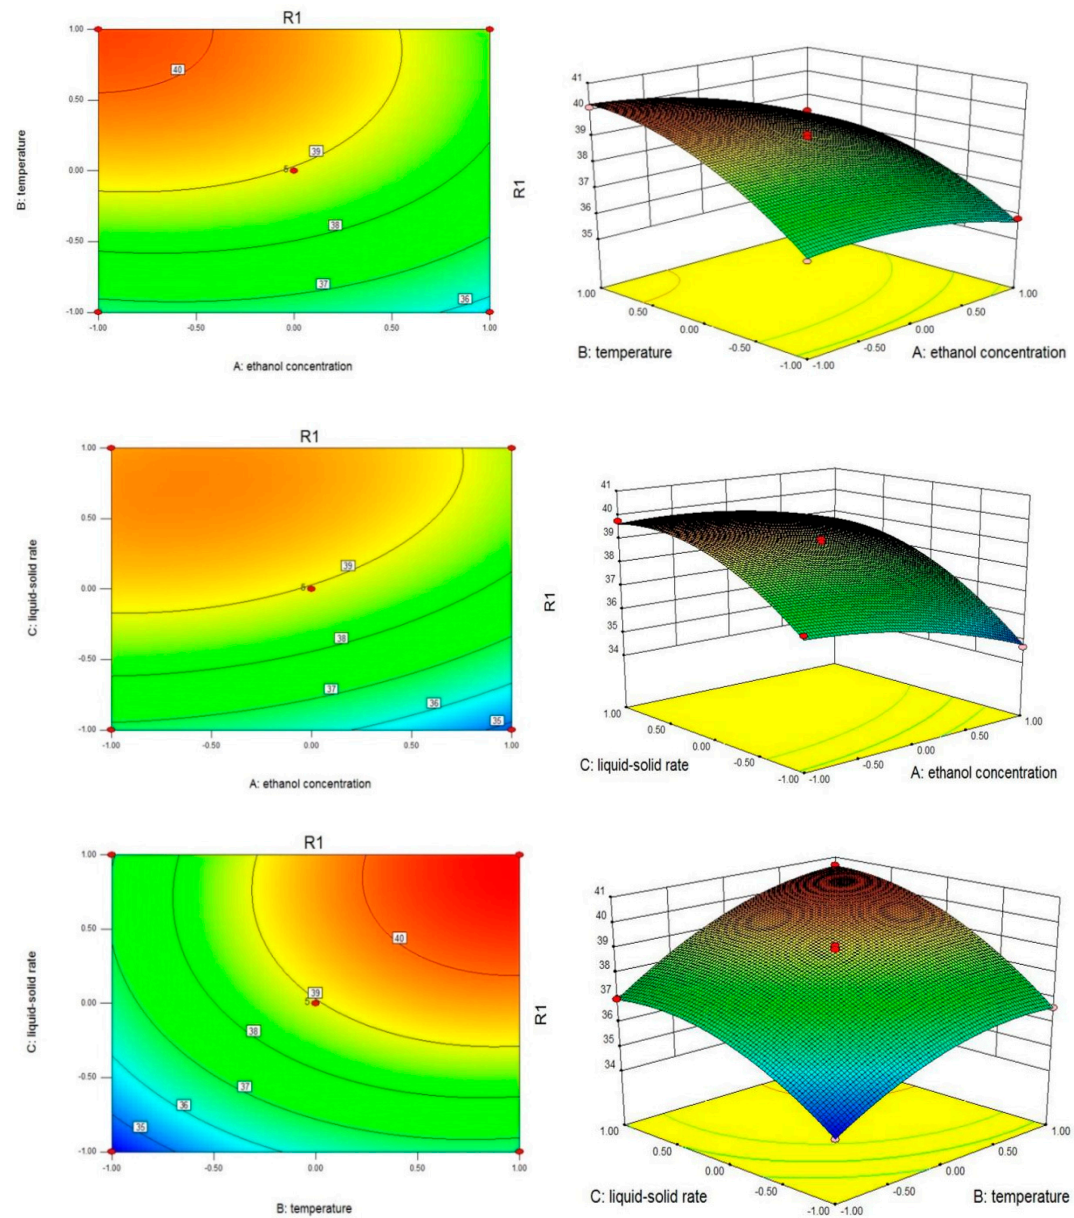

**Figure S1.** Response surface and corresponding contour plots of three factors on the DPPH radical scavenging activity
